# Supplementary material
Source: PubMed Central journal article supplement (PMC6377803)
Supplement: NIHMS1008638-supplement-1.pdf [file NIHMS1008638-supplement-1.pdf]

Online Appendix Table 1 — E-cigarette MLSA Law and Youth Substance Use  
National and State YRBSS: 2005-2015 (Strongly Balanced Sample)

| Panel A                          | <i>DV: Youth is a current smoker</i>  |                    |                     | <i>DV: Youth is a first-time smoker</i> |                     |                     |
|----------------------------------|---------------------------------------|--------------------|---------------------|-----------------------------------------|---------------------|---------------------|
|                                  | 1                                     | 2                  | 3                   | 4                                       | 5                   | 6                   |
| E-cigarette MLSA Law             | 0.010**<br>(0.004)                    | 0.014**<br>(0.006) | 0.017***<br>(0.005) | 0.006**<br>(0.003)                      | 0.007**<br>(0.004)  | 0.008***<br>(0.003) |
| <i>N</i>                         | 625,719                               | 625,719            | 625,719             | 455,908                                 | 455,908             | 455,908             |
| Panel B                          | <i>DV: Youth is a regular smoker</i>  |                    |                     | <i>DV: Youth is a heavy smoker</i>      |                     |                     |
|                                  | 1                                     | 2                  | 3                   | 4                                       | 5                   | 6                   |
| E-cigarette MLSA Law             | 0.008*<br>(0.004)                     | 0.011**<br>(0.004) | 0.009***<br>(0.003) | 0.008**<br>(0.003)                      | 0.011***<br>(0.004) | 0.009***<br>(0.003) |
| <i>N</i>                         | 625,719                               | 625,719            | 625,719             | 625,719                                 | 625,719             | 625,719             |
| Panel C                          | <i>DV: Youth is a current drinker</i> |                    |                     | <i>DV: Youth is a binge drinker</i>     |                     |                     |
|                                  | 1                                     | 2                  | 3                   | 4                                       | 5                   | 6                   |
| E-cigarette MLSA Law             | -0.002<br>(0.009)                     | 0.003<br>(0.010)   | 0.009<br>(0.010)    | 0.002<br>(0.007)                        | -0.003<br>(0.006)   | -0.001<br>(0.006)   |
| <i>N</i>                         | 589,491                               | 589,491            | 589,491             | 589,491                                 | 589,491             | 589,491             |
| Panel D                          | <i>DV: Youth is a marijuana user</i>  |                    |                     |                                         |                     |                     |
|                                  | 1                                     | 2                  | 3                   |                                         |                     |                     |
| E-cigarette MLSA Law             | 0.002<br>(0.009)                      | -0.005<br>(0.010)  | 0.000<br>(0.010)    |                                         |                     |                     |
| <i>N</i>                         | 632,304                               | 632,304            | 632,304             |                                         |                     |                     |
| Full Controls                    | ✓                                     | ✓                  | ✓                   | ✓                                       | ✓                   | ✓                   |
| State FEs                        | ✓                                     | ✓                  | ✓                   | ✓                                       | ✓                   | ✓                   |
| Year FEs                         | ✓                                     | ✓                  | ✓                   | ✓                                       | ✓                   | ✓                   |
| State-specific linear pre-trends |                                       | ✓                  |                     |                                         | ✓                   |                     |
| State-specific linear trends     |                                       |                    | ✓                   |                                         |                     | ✓                   |

Notes: Standard errors, clustered at the state level, are shown in parentheses.

\*  $p < 0.10$ , \*\*  $p < 0.05$ , \*\*\*  $p < 0.01$

All models include dummy variables for gender, race, age, and grade levels. State-level covariates listed in Table 1 are included. E-cigarette MLSA law, the leads, and the lags are defined in the text.

The definitions of youth substance use are in the text.

Online Figure 1 – Youth Substance Use Rates Between E-cigarette MLSA States and Synthetic Control States

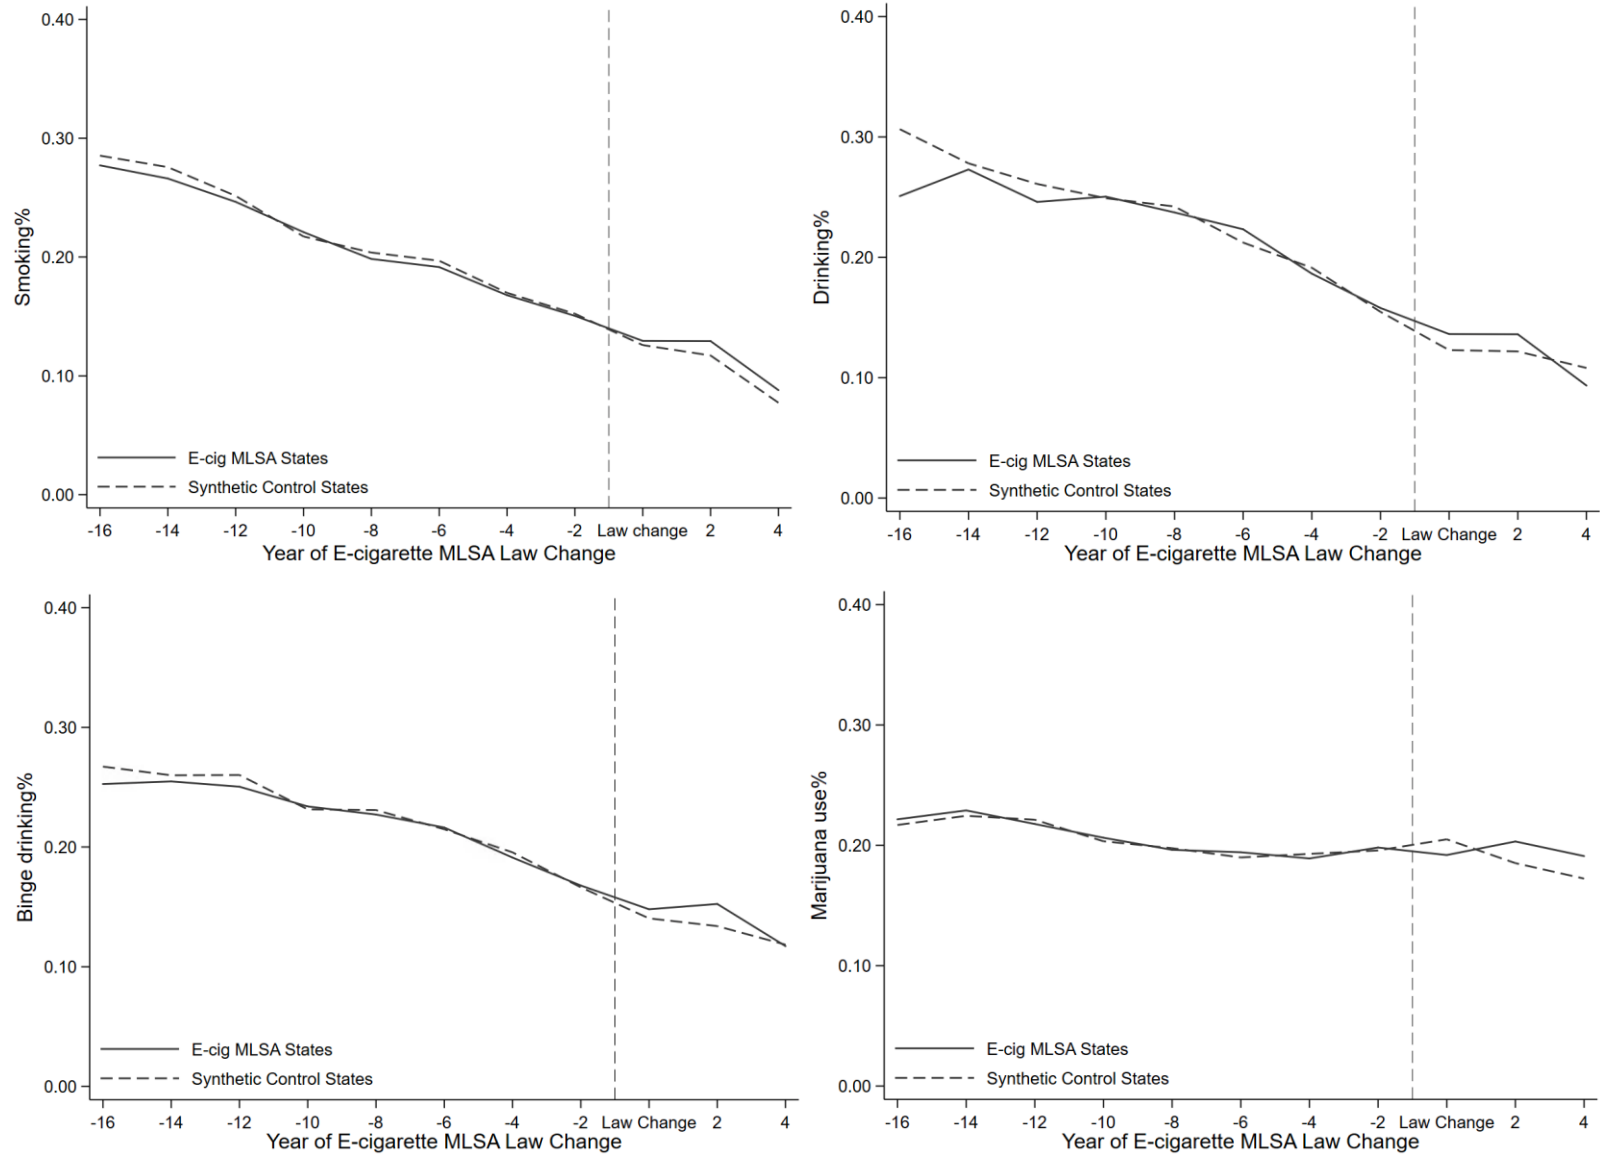

Notes: as in Figure 1, the x-axis indicates the survey year relative to the year of e-cigarette MLSA law change. The graph plots the mean youth substance use rates between the MLSA and synthetic control states after netting out the state fixed effects. For scaling purposes, we added the mean substance use rate calculated over the pooled SCM-weighted sample to each adjusted substance use rate (adjusted for state fixed effects). Sample statistics are weighted by the total underage population.

Online Appendix Table 2 — E-cigarette MLSA Law and Youth Substance Use  
SCM-weighted Sample

|                      | Current<br>Smoker | Current<br>Drinker | Current<br>Binge Drinker | Current<br>Marijuana User |
|----------------------|-------------------|--------------------|--------------------------|---------------------------|
| E-cigarette MLSA Law | 0.010*<br>(0.005) | 0.008<br>(0.009)   | 0.008<br>(0.006)         | -0.004<br>(0.009)         |
| State FEs            | ✓                 | ✓                  | ✓                        | ✓                         |
| <i>N</i>             | 245               | 245                | 245                      | 245                       |

Notes: Standard errors, calculated using Donald and Lang's (2007) two-step estimator, are shown in parentheses.

\*  $p < 0.10$

We run SCM on each MLSA state by excluding all the other MLSA states from the estimation sample. We then pool these individually created synthetic samples, thereby forming one larger SCM-weighted sample, and keep the synthetic weights unchanged. Lastly, we regress the difference of youth substance use rates between the MLSA states and synthetic control states on an indicator variable for the enactment of e-cigarette MLSA laws and control for a set of state dummy variables.

Youth aged 18 or above are excluded from creating such SCM-weighted sample.

Online Appendix Table 3 — Falsification Tests  
National and State YRBSS: 2005-2015

| <b>Panel A</b>                                      |                   |                   |                   |
|-----------------------------------------------------|-------------------|-------------------|-------------------|
| <b><i>DV: Youth is a current smoker</i></b>         | <b>1</b>          | <b>2</b>          | <b>3</b>          |
| E-cigarette MLSA Law                                | 0.012<br>(0.013)  | -0.006<br>(0.011) | -0.001<br>(0.014) |
| Mean of dep. var. in the control states             | 0.23              | 0.23              | 0.23              |
| <i>N</i>                                            | 93,716            | 93,716            | 93,716            |
| <b>Panel B</b>                                      |                   |                   |                   |
| <b><i>DV: Youth is a current drinker</i></b>        | <b>1</b>          | <b>2</b>          | <b>3</b>          |
| E-cigarette MLSA Law                                | -0.008<br>(0.018) | -0.011<br>(0.024) | -0.013<br>(0.019) |
| Mean of dep. var. in the control states             | 0.47              | 0.47              | 0.47              |
| <i>N</i>                                            | 88,992            | 88,992            | 88,992            |
| <b>Panel C</b>                                      |                   |                   |                   |
| <b><i>DV: Youth is a current binge drinker</i></b>  | <b>1</b>          | <b>2</b>          | <b>3</b>          |
| E-cigarette MLSA Law                                | -0.009<br>(0.014) | 0.003<br>(0.012)  | -0.002<br>(0.009) |
| Mean of dep. var. in the control states             | 0.31              | 0.31              | 0.31              |
| <i>N</i>                                            | 88,992            | 88,992            | 88,992            |
| <b>Panel D</b>                                      |                   |                   |                   |
| <b><i>DV: Youth is a current marijuana user</i></b> | <b>1</b>          | <b>2</b>          | <b>3</b>          |
| E-cigarette MLSA Law                                | -0.006<br>(0.015) | -0.019<br>(0.013) | -0.009<br>(0.015) |
| Mean of dep. var. in the control states             | 0.26              | 0.26              | 0.26              |
| <i>N</i>                                            | 95,906            | 95,906            | 95,906            |
| Full Controls                                       | ✓                 | ✓                 | ✓                 |
| State FEs                                           | ✓                 | ✓                 | ✓                 |
| Year FEs                                            | ✓                 | ✓                 | ✓                 |
| State-specific linear pre-trends                    |                   | ✓                 |                   |
| State-specific linear trends                        |                   |                   | ✓                 |

Notes: Standard errors, clustered at the state level, are shown in parentheses.

All models include dummy variables for gender, race, age, and grade levels. State-level covariates listed in Table 1 are included.

Definitions of current smokers, drinkers, binge drinkers, and marijuana users are in the text.

E-cigarette MLSA Law is defined in the text.

Sample is restricted to youth who have aged out of the e-cigarette MLSA laws and were not exposed to the laws while underage.

Online Appendix Table 4 — E-cigarette MLSA Law and Youth Smoking; Stratified by Gender  
National and State YRBSS: 2005-2015

| <i>DV: Youth is a current smoker</i>    | Boys               |                     |                     | Girls               |                   |                     |
|-----------------------------------------|--------------------|---------------------|---------------------|---------------------|-------------------|---------------------|
|                                         | 1                  | 2                   | 3                   | 4                   | 5                 | 6                   |
| <b>Panel A</b>                          |                    |                     |                     |                     |                   |                     |
| E-cigarette MLSA Law                    | 0.013**<br>(0.006) | 0.016**<br>(0.006)  | 0.019***<br>(0.005) | 0.006<br>(0.005)    | 0.008<br>(0.005)  | 0.012**<br>(0.005)  |
| <b>Panel B</b>                          |                    |                     |                     |                     |                   |                     |
| E-cigarette MLSA ≤2 Waves Pre           | -0.001<br>(0.005)  | -0.003<br>(0.007)   | -0.006<br>(0.005)   | -0.003<br>(0.004)   | -0.005<br>(0.005) | -0.007<br>(0.004)   |
| E-cigarette MLSA 1 Wave Pre (Ref.)      | –                  | –                   | –                   | –                   | –                 | –                   |
| E-cigarette MLSA Wave of Implementation | 0.013**<br>(0.006) | 0.019**<br>(0.008)  | 0.023***<br>(0.007) | 0.006<br>(0.005)    | 0.011*<br>(0.007) | 0.014***<br>(0.005) |
| E-cigarette MLSA ≥1 Wave Post           | 0.027**<br>(0.011) | 0.045***<br>(0.016) | 0.032*<br>(0.017)   | 0.018***<br>(0.006) | 0.018*<br>(0.010) | 0.013<br>(0.010)    |
| Full Controls                           | ✓                  | ✓                   | ✓                   | ✓                   | ✓                 | ✓                   |
| State FEs                               | ✓                  | ✓                   | ✓                   | ✓                   | ✓                 | ✓                   |
| Year FEs                                | ✓                  | ✓                   | ✓                   | ✓                   | ✓                 | ✓                   |
| State-specific linear pre-trends        |                    | ✓                   |                     |                     | ✓                 |                     |
| State-specific linear trends            |                    |                     | ✓                   |                     |                   | ✓                   |
| Mean of dep. var. in the control states | 0.16               | 0.16                | 0.16                | 0.14                | 0.14              | 0.14                |
| Observations                            | 359,044            | 359,044             | 359,044             | 393,288             | 393,288           | 393,288             |

Notes: Standard errors, clustered at the state level, are shown in parentheses.

\* p < 0.10, \*\* p < 0.05, \*\*\* p < 0.01

All models include dummy variables for race, age, and grade levels. State-level covariates listed in Table 1 are included.

We define youth as current smokers if any days of smoking over the past month are reported. The analysis sample is restricted to youth younger than 18.

E-cigarette MLSA Law, the leads, and the lags are defined in the text. One wave means one survey year.

Online Appendix Table 5 — E-cigarette MLSA Law and Youth Smoking; Stratified by Grade  
National and State YRBSS: 2005-2015

| <i>DV: Youth is a current smoker</i>    | 9 & 10th graders    |                  |                    | 11 & 12th graders   |                    |                     |
|-----------------------------------------|---------------------|------------------|--------------------|---------------------|--------------------|---------------------|
|                                         | 1                   | 2                | 3                  | 4                   | 5                  | 6                   |
| <b>Panel A</b>                          |                     |                  |                    |                     |                    |                     |
| E-cigarette MLSA Law                    | 0.012**<br>(0.005)  | 0.014<br>(0.009) | 0.016**<br>(0.007) | 0.008*<br>(0.005)   | 0.016*<br>(0.009)  | 0.018***<br>(0.005) |
| <b>Panel B</b>                          |                     |                  |                    |                     |                    |                     |
| E-cigarette MLSA ≤2 Waves Pre           | -0.003<br>(0.005)   | 0.003<br>(0.009) | -0.001<br>(0.006)  | -0.011<br>(0.008)   | -0.016<br>(0.011)  | -0.017*<br>(0.007)  |
| E-cigarette MLSA 1 Wave Pre (Ref.)      | –                   | –                | –                  | –                   | –                  | –                   |
| E-cigarette MLSA Wave of Implementation | 0.012**<br>(0.005)  | 0.012<br>(0.012) | 0.016**<br>(0.008) | 0.007*<br>(0.004)   | 0.024**<br>(0.011) | 0.025***<br>(0.008) |
| E-cigarette MLSA ≥1 Wave Post           | 0.022***<br>(0.007) | 0.021<br>(0.016) | 0.016<br>(0.016)   | 0.018***<br>(0.005) | 0.036<br>(0.022)   | 0.046*<br>(0.024)   |
| Full Controls                           | ✓                   | ✓                | ✓                  | ✓                   | ✓                  | ✓                   |
| State FEs                               | ✓                   | ✓                | ✓                  | ✓                   | ✓                  | ✓                   |
| Year FEs                                | ✓                   | ✓                | ✓                  | ✓                   | ✓                  | ✓                   |
| State-specific linear pre-trends        |                     | ✓                |                    |                     | ✓                  |                     |
| State-specific linear trends            |                     |                  | ✓                  |                     |                    | ✓                   |
| Mean of dep. var. in the control states | 0.12                | 0.12             | 0.12               | 0.16                | 0.16               | 0.16                |
| Observations                            | 461,560             | 461,560          | 461,560            | 290,772             | 290,772            | 290,772             |

Notes: Standard errors, clustered at the state level, are shown in parentheses.

\* p < 0.10, \*\* p < 0.05, \*\*\* p < 0.01

All models include dummy variables for gender, race, age, and grade levels. State-level covariates listed in Table 1 are included.

We define youth as current smokers if any days of smoking is reported in the past month. The analysis sample is restricted to youth younger than 18.

E-cigarette MLSA Law, the leads, and the lags are defined in the text. One wave means one survey year

Online Appendix Table 6 — National and State YRBSS State by Year Observation Counts

| State                | 2005  | 2007   | 2009   | 2011   | 2013   | 2015   |
|----------------------|-------|--------|--------|--------|--------|--------|
| Alabama              | 1,026 | 483    | 2,528  | 1,654  | 1,845  | 1,810  |
| Alaska               |       | 1,268  | 1,218  | 1,279  | 1,183  | 1,343  |
| Arizona              | 3,502 | 3,545  | 2,846  | 3,876  | 1,744  | 2,698  |
| Arkansas             | 1,503 | 1,979  | 1,927  | 1,327  | 1,802  | 2,746  |
| California           | 1,553 | 2,110  | 2,802  | 1,877  | 2,463  | 5,779  |
| Colorado             | 1,475 |        | 1,684  | 1,721  | 304    | 270    |
| Connecticut          | 2,442 | 1,997  | 2,319  | 2,000  | 2,377  | 2,429  |
| Delaware             | 2,633 | 2,357  | 2,257  | 2,421  | 2,590  | 2,638  |
| District of Columbia |       |        |        | 316    |        |        |
| Florida              | 4,982 | 5,098  | 5,591  | 7,409  | 6,840  | 6,854  |
| Georgia              | 3,579 | 2,744  | 3,146  | 2,033  | 2,278  | 402    |
| Hawaii               | 1,627 | 1,148  | 1,692  | 4,172  | 4,467  |        |
| Idaho                | 1,667 | 1,384  | 2,102  | 1,921  | 2,090  | 2,050  |
| Illinois             | 492   | 2,956  | 4,432  | 4,500  | 3,793  | 4,022  |
| Indiana              | 1,682 | 2,653  | 1,473  | 3,062  | 824    | 2,057  |
| Iowa                 | 1,588 | 1,666  |        | 1,513  |        |        |
| Kansas               | 1,909 | 1,692  | 2,196  | 2,133  | 2,089  |        |
| Kentucky             | 3,766 | 3,842  | 1,726  | 1,973  | 2,257  | 2,465  |
| Louisiana            | 158   | 1,299  | 1,437  | 1,115  | 1,063  |        |
| Maine                | 1,325 | 1,267  | 8,445  | 9,079  | 8,343  | 9,112  |
| Maryland             | 1,398 | 1,486  | 1,590  | 2,793  | 51,769 | 54,356 |
| Massachusetts        | 3,598 | 3,745  | 2,624  | 2,915  | 2,630  | 3,238  |
| Michigan             | 3,479 | 3,723  | 3,636  | 4,711  | 4,627  | 4,879  |
| Minnesota            | 95    |        | 188    |        | 292    | 745    |
| Mississippi          |       | 1,923  | 1,763  | 1,846  | 2,144  | 2,040  |
| Missouri             | 1,963 | 1,865  | 1,681  | 344    | 1,825  | 1,594  |
| Montana              | 2,987 | 3,846  | 1,785  | 4,022  | 4,745  | 4,308  |
| Nebraska             | 3,706 |        |        | 3,719  | 1,824  | 1,634  |
| Nevada               | 1,529 | 1,729  | 2,403  | 207    | 2,069  | 1,787  |
| New Hampshire        | 1,249 | 1,581  | 1,450  | 1,359  | 1,590  | 14,310 |
| New Jersey           | 1,800 | 689    | 2,203  | 1,730  | 2,027  | 208    |
| New Mexico           | 5,417 | 2,780  | 5,495  | 5,685  | 5,325  | 8,486  |
| New York             | 9,939 | 13,688 | 15,335 | 13,161 | 10,409 | 10,406 |
| North Carolina       | 4,466 | 3,975  | 5,550  | 3,324  | 2,171  | 5,891  |
| North Dakota         | 1,710 | 1,722  | 1,767  | 1,863  | 1,919  | 2,064  |
| Ohio                 | 1,663 | 2,433  |        | 1,358  | 1,578  | 227    |
| Oklahoma             | 1,923 | 2,842  | 1,397  | 1,136  | 1,465  | 1,934  |
| Oregon               | 268   |        | 247    |        |        |        |
| Pennsylvania         | 423   | 210    | 3,104  | 450    | 264    | 3,278  |
| Rhode Island         | 2,316 | 2,133  | 3,106  | 3,814  | 2,357  | 4,004  |
| South Carolina       | 1,567 | 1,206  | 1,070  | 1,437  | 1,553  | 1,311  |

|               |       |       |       |       |       |        |
|---------------|-------|-------|-------|-------|-------|--------|
| South Dakota  | 1,567 | 1,577 | 2,122 | 1,502 | 1,273 | 1,257  |
| Tennessee     | 1,924 | 2,182 | 2,176 | 2,874 | 1,847 | 4,371  |
| Texas         | 5,821 | 4,906 | 4,766 | 5,841 | 3,479 | 1,226  |
| Utah          | 1,710 | 2,097 | 1,544 | 1,657 | 2,118 |        |
| Vermont       | 6,997 | 5,744 | 8,190 | 8,267 |       | 20,151 |
| Virginia      | 349   | 439   | 98    | 1,603 | 7,776 | 4,310  |
| Washington    | 101   |       | 246   | 167   | 195   | 102    |
| West Virginia | 1,549 | 1,598 | 2,071 | 2,375 | 1,753 | 1,803  |
| Wisconsin     | 2,593 | 2,234 | 3,074 | 3,615 | 2,776 |        |
| Wyoming       | 2,455 | 2,174 | 2,802 | 2,439 | 2,924 | 2,317  |

---



Online Appendix Table 7 — National and State YRBSS State by Year Observation Counts (Strongly Balanced Sample)

| State          | 2005  | 2007   | 2009   | 2011   | 2013   | 2015   |
|----------------|-------|--------|--------|--------|--------|--------|
| Alabama        | 1,026 | 483    | 2,528  | 1,654  | 1,845  | 1,810  |
| Arizona        | 3,502 | 3,545  | 2,846  | 3,876  | 1,744  | 2,698  |
| Arkansas       | 1,503 | 1,979  | 1,927  | 1,327  | 1,802  | 2,746  |
| California     | 1,553 | 2,110  | 2,802  | 1,877  | 2,463  | 5,779  |
| Connecticut    | 2,442 | 1,997  | 2,319  | 2,000  | 2,377  | 2,429  |
| Delaware       | 2,633 | 2,357  | 2,257  | 2,421  | 2,590  | 2,638  |
| Florida        | 4,982 | 5,098  | 5,591  | 7,409  | 6,840  | 6,854  |
| Georgia        | 3,579 | 2,744  | 3,146  | 2,033  | 2,278  | 402    |
| Idaho          | 1,667 | 1,384  | 2,102  | 1,921  | 2,090  | 2,050  |
| Illinois       | 492   | 2,956  | 4,432  | 4,500  | 3,793  | 4,022  |
| Indiana        | 1,682 | 2,653  | 1,473  | 3,062  | 824    | 2,057  |
| Kentucky       | 3,766 | 3,842  | 1,726  | 1,973  | 2,257  | 2,465  |
| Maine          | 1,325 | 1,267  | 8,445  | 9,079  | 8,343  | 9,112  |
| Maryland       | 1,398 | 1,486  | 1,590  | 2,793  | 51,769 | 54,356 |
| Massachusetts  | 3,598 | 3,745  | 2,624  | 2,915  | 2,630  | 3,238  |
| Michigan       | 3,479 | 3,723  | 3,636  | 4,711  | 4,627  | 4,879  |
| Missouri       | 1,963 | 1,865  | 1,681  | 344    | 1,825  | 1,594  |
| Montana        | 2,987 | 3,846  | 1,785  | 4,022  | 4,745  | 4,308  |
| Nevada         | 1,529 | 1,729  | 2,403  | 207    | 2,069  | 1,787  |
| New Hampshire  | 1,249 | 1,581  | 1,450  | 1,359  | 1,590  | 14,310 |
| New Jersey     | 1,800 | 689    | 2,203  | 1,730  | 2,027  | 208    |
| New Mexico     | 5,417 | 2,780  | 5,495  | 5,685  | 5,325  | 8,486  |
| New York       | 9,939 | 13,688 | 15,335 | 13,161 | 10,409 | 10,406 |
| North Carolina | 4,466 | 3,975  | 5,550  | 3,324  | 2,171  | 5,891  |
| North Dakota   | 1,710 | 1,722  | 1,767  | 1,863  | 1,919  | 2,064  |
| Oklahoma       | 1,923 | 2,842  | 1,397  | 1,136  | 1,465  | 1,934  |
| Pennsylvania   | 423   | 210    | 3,104  | 450    | 264    | 3,278  |
| Rhode Island   | 2,316 | 2,133  | 3,106  | 3,814  | 2,357  | 4,004  |
| South Carolina | 1,567 | 1,206  | 1,070  | 1,437  | 1,553  | 1,311  |
| South Dakota   | 1,567 | 1,577  | 2,122  | 1,502  | 1,273  | 1,257  |
| Tennessee      | 1,924 | 2,182  | 2,176  | 2,874  | 1,847  | 4,371  |
| Texas          | 5,821 | 4,906  | 4,766  | 5,841  | 3,479  | 1,226  |
| Virginia       | 349   | 439    | 98     | 1,603  | 7,776  | 4,310  |
| West Virginia  | 1,549 | 1,598  | 2,071  | 2,375  | 1,753  | 1,803  |
| Wyoming        | 2,455 | 2,174  | 2,802  | 2,439  | 2,924  | 2,317  |

## Online Data Appendix

Our analysis sample uses data from the pooled national and state YRBSS, spanning 2005-2015. The national YRBSS is conducted by CDC and the state YRBSS, while coordinated by CDC, is administered by each state health department or education agency. By default, the national YRBSS does not provide state identifiers, but we have obtained this information from CDC. States that have administered YRBSS may not distribute data for secondary analyses when response rates are low, and we do not include these data in analyses. Although we have only three waves (5 years) of post-policy data given the biennial structure of the YRBSS, there is sufficient variation in the observed exposure to e-cigarette MLSA laws within states over time, which we exploit to identify the policy effects. Online Appendix Tables 6 and 7 display the number of observations at each state by year cell from the pooled national and state YRBSS.

For dependent variables, we use a battery of questions relating to youth risky behaviors such as smoking, drinking, and other substance use is consistently available in each wave of the YRBSS. We define dichotomous indicators for past month participation in smoking, alcohol consumption, binge drinking (consuming 5 or more drinks of alcohol in a row), and marijuana use. We also define an indicator for smoking initiation based on youth current age and the age they reported smoking a full cigarette for the first time; this indicator captures whether the respondent initiated smoking in a given wave if their current age matches their reported age of smoking onset.

For time-varying control variables, we control for an extensive set of confounding policy shifts over this period: federal and state cigarette excise taxes, state beer taxes, medical marijuana laws (MMLs), marijuana decriminalization laws, state unemployment rates, and the natural logarithm of state per capita income. To proxy for anti-smoking sentiment, we control for the presence of comprehensive smoke-free air laws covering four venues: government and private worksites, restaurants, and bars. We also account for anti-vaping sentiment by using an indicator variable for whether vaping in private workplaces is restricted. No partial bans on vaping in private workplaces exist.

We do not use e-cigarette taxes as a control because only Minnesota has levied taxes on e-cigarettes over the study period. Lastly, we control for a set of underage drinking regulations, ranging from zero-tolerance laws to laws related to alcohol possession, alcohol consumption, alcohol purchase, license suspension, parties involving underage drinking, and keg registration, to account for the social norm against underage drinking. These data come from the Alcohol Policy Information System.

Our control for medical marijuana laws follow Choi, Dave, and Sabia (2016) by creating a set of indicator variables tracking the law's overall legislative decision and its separate statutes related to home cultivation, legal dispensaries, allowance for non-specific pain, and state registry. Home cultivation allows qualified patients and their caregivers to grow cannabis plants at home. Legal dispensaries offer protection to legal marijuana supply through retail dispensaries. Allowance for non-specific pain relaxes the constraint that medical marijuana is reserved for particular medical symptoms. And state registry requires medical marijuana users to register with a state or local authority.

The cigarette tax data come from the CDC STATE System and the beer tax data come from the National Institute on Alcohol Abuse and Alcoholism. We use tax rates as of March for both variables to match the study period over which surveys were conducted. We obtain state unemployment rates and per capita income from the Bureau of Labor Statistics. Both cigarette and beer taxes are inflation-adjusted to 2005 dollars using the Consumer Price Index for All Urban Consumers (CPI-U), and we transform the per capita income using a natural logarithm.

Reference:

Choi, Anna, Dhaval Dave, and Joseph J. Sabia. *Smoke gets in your eyes: Medical marijuana laws and tobacco use*. No. w22554. National Bureau of Economic Research, 2016.
